# Supplementary material for: Caspofungin-Induced Cardiotoxicity in Patients Treating for Candidemia
Source: MDPI journal article supplement (doi:10.3390/toxics10090521), 2022-08-31
Supplement: s1 [file s1]

**Table S1:** Frequency of the patients in the study subgroups

|                        |                  | N  | %   |
|------------------------|------------------|----|-----|
| Gender                 | Female           | 5  | 33  |
|                        | Male             | 10 | 67  |
| Drug infusion          | Peripheral       | 9  | 60  |
|                        | Central          | 6  | 40  |
| DM                     | Diabetic         | 1  | 6.7 |
|                        | Nondiabetic      | 14 | 93  |
| HTN                    | Hypertensive     | 1  | 6.7 |
|                        | Non-hypertensive | 14 | 93  |
| Chronic kidney disease | Non-CKD          | 15 | 100 |
| Atrial fibrillation    | Non-AF           | 15 | 100 |

AF, Atrial fibrillation; CKD, Chronic kidney disease; DM, Diabetes mellitus; HTN, Hypertension

**Table S2. Paired Samples Correlation and the coefficient of determination (before and after caspofungin injection)**

|        |                  | N  | Correlation | p-value | r <sup>2</sup> |
|--------|------------------|----|-------------|---------|----------------|
| Pair 1 | Simpson LVEF 1&2 | 15 | 0.05        | 0.8     |                |
| Pair 2 | GLS 1&2          | 15 | 0.41        | 0.12    |                |
| Pair 3 | Tei index 1&2    | 15 | 0.29        | 0.27    |                |
| Pair 4 | LAVI 1&2         | 15 | 0.56        | 0.02    | 0.31           |
| Pair 5 | hs-cTnI 1&2      | 15 | 0.92        | 0       | 0.85           |

LVEF, left ventricular ejection fraction; GLS, global longitudinal strain; LAVI, Left atrial volume index; hs-cTnI, high-sensitivity cardiac troponin I
